# Supplementary material for: Cell Surface Expression of Nrg1 Protein in Candida auris
Source: MDPI journal article supplement (doi:10.3390/jof7040262), 2021-03-31

# Cell surface expression of Nrg1 protein in *Candida auris*

Anuja Paudyal<sup>1</sup> and Govindsamy Vedyappan<sup>2,\*</sup>,

Division of Biology, Kansas State University, Manhattan KS 66506, USA

<sup>1</sup> anuja@ksu.edu; <sup>2</sup> gvediyap@ksu.edu \*Correspondence: gvediyap@ksu.edu

**Figure S1. Determination of specificity of the anti-*Cal*Nrg1 antibody.** The *Cal*Nrg1 antibody was divided into two equal aliquots. One of the aliquots was incubated to a PVDF membrane containing the immobilized *C. albicans* purified Nrg1 protein overnight at 4 °C on a roller. To verify if the *C. albicans* Nrg1p depleted antibody can still detect *C. auris* Nrg1p, one set of cytosolic proteins from *C. auris* (clades I & II) was analyzed by Western blot (left panel). The second set of the identical blot was analyzed in parallel with the original (undepleted) anti-Nrg1 antibody (right panel). *C. albicans nrg1* null mutant was also included as a negative control. While the undepleted anti-Nrg1 antibody reacted to a single protein band of about 52 kDa, the depleted antibody failed to show a strong reaction to *C. auris* cellular proteins suggesting the anti-*Cal*Nrg1 antibody recognizes Nrg1p specifically. The anti-GAPDH HRP-conjugate (human) antibody was used as a loading control.

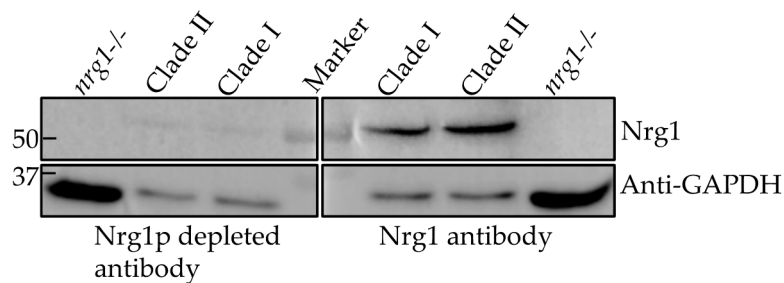

Supplement: s1 [file s1]
